# Supplementary material for: Comparison of three clustering approaches for detecting novel environmental microbial diversity
Source: PubMed Central journal article supplement (PMC4782723; doi:10.7717/peerj.1692), 2016-02-25

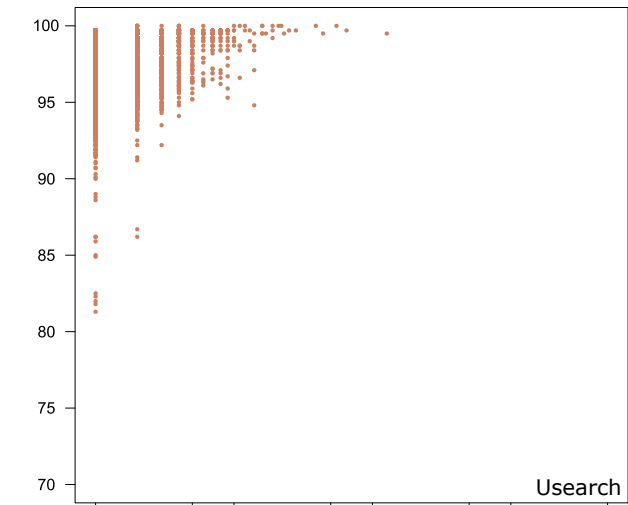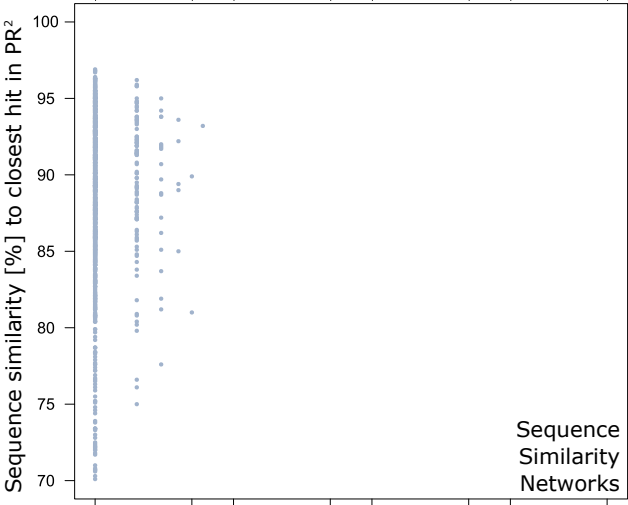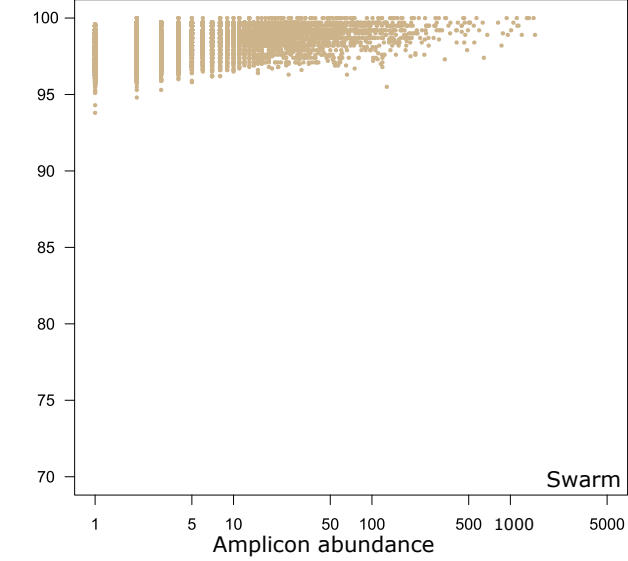

Supplement: peerj-04-1692-s002.pdf [file peerj-04-1692-s002.pdf]
